# Supplementary material for: Efficacy of comprehensive cognitive health management for Shanghai community older adults with mild cognitive impairment
Source: HighWire-hosted journal article supplement (doi:10.1136/gpsych-2021-100532), 2022-08-01
Supplement: gpsych-2021-100532supp002_data_supplement.pdf [file gpsych-2021-100532supp002_data_supplement.pdf]

Supplementary table 2. Generalized linear model analysis (GLMM) in older adults with NC in MoCA scores

| fixed effects   |         |          | coefficients for fixed effects |          |         |        |          |
|-----------------|---------|----------|--------------------------------|----------|---------|--------|----------|
| Effect          | F Value | <i>p</i> | Effect                         | estimate | St Erro | t      | <i>p</i> |
| corrected model | 62.12   | <0.001** | intercept                      | 2.78     | 0.027   | 102.23 | <0.001** |
| group           | 0.004   | 0.95     | group=1a                       | -0.0007  | 0.012   | -0.59  | 0.55     |
| follow-up       | 1.178   | 0.28     | follow-up=1b                   | -0.012   | 0.008   | -1.56  | 0.12     |
| group*follow-up | 1.26    | 0.26     | [group=1]*[follow-up=1]        | 0.012    | 0.011   | 1.12   | 0.26     |

Notes: (a)Group=1=intervention group;

(b) Follow-up=1=1-year follow-up.
